# Supplementary material for: Optimal dispatch of integrated energy systems considering integrated demand response and stepped carbon trading
Source: Frontiers journal article supplement (doi:10.3389/felec.2023.1110039), 2023-02-23
Supplement: Data_Sheet_1.zip [file Data_Sheet_1.zip]

## Sheet: Sheet1
Iterations	Traditional DE algorithm	Improved DE algorithm
22	50068.9	52798
23	50068.9	52798
24	50068.9	52798
25	49194.1	52798
26	49194.1	52798
27	49190.3	52798
28	49190.3	52798
29	49057.6	52798
30	49057.6	52798
31	48284.4	52798
32	48284.4	52798
33	48284.4	52798
34	48284.4	52798
35	47732.6	52798
36	47720.4	52798
37	47538.8	52798
38	46877.6	52798
39	46877.6	52798
40	46877.6	47998
41	46877.6	47998
42	46752.2	47998
43	46002.9	47998
44	46002.9	47998
45	46002.9	47998
46	45729	47998
47	45729	47998
48	45332.8	47998
49	45130	47998
50	45130	47998
51	45008.9	47998
52	45008.9	47998
53	44978.5	47998
54	44978.5	47998
55	44978.5	47998
56	44841.6	47998
57	44841.6	47998
58	44268.9	47998
59	44189.9	47998
60	44189.9	47998
61	44189.9	47998
62	43983.3	47998
63	43915.5	47998
64	43530.6	47998
65	43403.1	47998
66	43403.1	47998
67	43337.4	47998
68	43337.4	47998
69	43023	47998
70	43023	47998
71	42826	47998
72	42826	47998
73	42826	47998
74	42826	47998
75	42826	47998
76	42826	47998
77	42747.9	47998
78	42747.9	47998
79	42476.4	47998
80	42476.4	47998
81	42343.5	47998
82	42343.5	47998
83	42123.2	47998
84	42123.2	47998
85	42123.2	47998
86	42123.2	47998
87	42123.2	47998
88	42032.7	47998
89	41256	47998
90	41256	47998
91	41256	47998
92	41175.8	47998
93	41175.8	47998
94	41175.8	47998
95	41175.8	47998
96	41175.8	47998
97	41175.8	47998
98	41175.8	47998
99	41175.8	47998
100	40928.3	47998
101	40928.3	47998
102	40928.3	47998
103	40915.8	47998
104	40915.8	47998
105	40915.8	47998
106	40680	47998
107	40503.7	47998
108	40503.7	47998
109	40503.7	47998
110	40448	47998
111	40448	47998
112	40423.5	47998
113	40364.8	47998
114	40328.7	47998
115	40328.7	47998
116	40318.1	47998
117	40189.4	47998
118	40126.2	47998
119	40126.2	47998
120	40126.2	47998
121	40126.2	47998
122	40126.2	47998
123	39968.1	47998
124	39727.1	47998
125	39727.1	47998
126	39727.1	47998
127	39727.1	47998
128	39727.1	47998
129	39531.9	47998
130	39531.9	47998
131	39531.9	47998
132	39531.9	47998
133	39531.9	47998
134	39440.6	47998
135	39348	47998
136	39348	47998
137	39227.2	47998
138	39227.2	47998
139	39227.2	47998
140	39227.2	47998
141	39227.2	47998
142	39184.1	47998
143	38911.8	47998
144	38911.8	47998
145	38911.8	47998
146	38911.8	47998
147	38911.8	47998
148	38911.8	47998
149	38911.8	47998
150	38911.8	47998
151	38911.8	47998
152	38911.8	47998
153	38911.8	47998
154	38879.6	47998
155	38879.6	47998
156	38879.6	47998
157	38820.5	47998
158	38820.5	47998
159	38820.5	47998
160	38697.8	47998
161	38697.8	47998
162	38697.8	47998
163	38648.4	47998
164	38648.4	47998
165	38581.7	47998
166	38580.2	47998
167	38580.2	47998
168	38580.2	47998
169	38580.2	47998
170	38580.2	47998
171	38418.5	44869
172	38418.5	44869
173	38367.4	44869
174	38367.4	44869
175	38367.4	44869
176	38342.6	44869
177	38294.1	44869
178	38294.1	44869
179	38294.1	44869
180	38269	44869
181	38269	44869
182	38269	44869
183	38200.2	44869
184	38200.2	44869
185	38114.8	44869
186	38114.8	44869
187	38114.8	44869
188	38114.8	44869
189	38114.8	44869
190	38114.8	44869
191	37992.1	44869
192	37992.1	44869
193	37968.4	44869
194	37968.4	44869
195	37948.8	44869
196	37948.8	44869
197	37948.8	44869
198	37948.8	44869
199	37893.3	44869
200	37893.3	44869
201	37893.3	44869
202	37893.3	44869
203	37893.3	44869
204	37841.8	44869
205	37841.8	44869
206	37841.8	44869
207	37743.2	44869
208	37743.2	44869
209	37743.2	44869
210	37710	44869
211	37710	44869
212	37710	44869
213	37710	44869
214	37689.2	44869
215	37689.2	44869
216	37689.2	44869
217	37689.2	44869
218	37677.8	44869
219	37677.8	44869
220	37670.4	44869
221	37670.4	44869
222	37670.4	44869
223	37667.2	44869
224	37627.4	44869
225	37618.3	44869
226	37584	44869
227	37584	44869
228	37584	44869
229	37584	44869
230	37584	44869
231	37584	44869
232	37561.7	44869
233	37496.8	44869
234	37496.8	44869
235	37494.1	44869
236	37485.1	44869
237	37473.3	44869
238	37473.3	44869
239	37473.3	44869
240	37414.8	44869
241	37414.8	44869
242	37414.8	44869
243	37413.6	44869
244	37406.9	44869
245	37406.9	44869
246	37359.3	44869
247	37359.3	44869
248	37305.6	44869
249	37266.5	44869
250	37266.5	44869
251	37266.5	44869
252	37266.5	44869
253	37266.5	44869
254	37266.5	44869
255	37233.2	44869
256	37233.2	44869
257	37232.1	44869
258	37217.1	44869
259	37217.1	44869
260	37217.1	44869
261	37217.1	44869
262	37217.1	44869
263	37217.1	44869
264	37217.1	44869
265	37217.1	44869
266	37217.1	44869
267	37191.4	44869
268	37191.4	44869
269	37191.4	44869
270	37191.4	44869
271	37191.4	44869
272	37164.2	44869
273	37164.2	44869
274	37164.2	44869
275	37164.2	44869
276	37164.2	44869
277	37164.2	44869
278	37156.5	44869
279	37119.3	44869
280	37119.3	44869
281	37119.3	40110
282	37119.3	40110
283	37119.3	40110
284	37119.3	40110
285	37119.3	40110
286	37119.3	40110
287	37110.4	40110
288	37091.4	40110
289	37091.4	40110
290	37086.3	40110
291	37071.1	40110
292	37071.1	40110
293	37071.1	40110
294	37044.6	40110
295	37044.6	40110
296	37014.6	40110
297	37014.6	40110
298	37014	40110
299	37008.1	40110
300	37008.1	40110
301	37003.7	40110
302	36996.9	40110
303	36996.9	40110
304	36987.4	40110
305	36986.1	40110
306	36986.1	40110
307	36986.1	40110
308	36986.1	40110
309	36986.1	40110
310	36973.3	40110
311	36966.2	40110
312	36955.7	40110
313	36955.7	40110
314	36949.2	40110
315	36949.2	40110
316	36949.2	40110
317	36949.2	40110
318	36948.5	40110
319	36948.5	40110
320	36899.4	40110
321	36899.4	40110
322	36899.4	40110
323	36899.4	40110
324	36898.7	40110
325	36898.7	40110
326	36898.7	40110
327	36898.7	40110
328	36898.7	40110
329	36898.7	40110
330	36898.7	40110
331	36898.7	40110
332	36863.6	40110
333	36863.6	40110
334	36863.6	40110
335	36863.6	40110
336	36863.6	40110
337	36863.6	40110
338	36863.6	40110
339	36832.1	40110
340	36832.1	40110
341	36832.1	40110
342	36832.1	40110
343	36832.1	40110
344	36832.1	40110
345	36832.1	40110
346	36832.1	40110
347	36832.1	40110
348	36832.1	40110
349	36832.1	40110
350	36832.1	40110
351	36832.1	40110
352	36832.1	40110
353	36832.1	40110
354	36824.1	40110
355	36824.1	40110
356	36824.1	40110
357	36815.4	40110
358	36815.4	40110
359	36814.4	40110
360	36814.4	40110
361	36814.4	40110
362	36810.7	40110
363	36810.7	40110
364	36803.1	40110
365	36803.1	40110
366	36803.1	40110
367	36803.1	40110
368	36802.1	40110
369	36802.1	40110
370	36802.1	40110
371	36802.1	40110
372	36794.7	40110
373	36789.4	40110
374	36771.5	40110
375	36771.5	40110
376	36771.5	40110
377	36771.5	40110
378	36748.7	40110
379	36748.7	40110
380	36748.7	40110
381	36748.7	40110
382	36748.7	40110
383	36748.7	40110
384	36748.7	40110
385	36748.7	40110
386	36748.7	40110
387	36748.7	40110
388	36748.7	40110
389	36748.7	40110
390	36748.7	40110
391	36748.7	40110
392	36748.7	40110
393	36748.7	40110
394	36748.7	40110
395	36732.9	40110
396	36732.9	40110
397	36732.9	40110
398	36732.9	40110
399	36732.9	40110
400	36732.9	40110
401	36715.3	40110
402	36715.3	40110
403	36715.3	40110
404	36715.3	40110
405	36715.3	40110
406	36715.3	40110
407	36715.3	40110
408	36715.3	40110
409	36694.3	40110
410	36694.3	38488
411	36694.3	38488
412	36694.3	38488
413	36694.3	38488
414	36694.3	38488
415	36694.3	38488
416	36694.3	38488
417	36670	38488
418	36670	38488
419	36670	38488
420	36670	38488
421	36670	38488
422	36670	38488
423	36670	38488
424	36670	38488
425	36670	38488
426	36670	37591
427	36670	37591
428	36670	37591
429	36670	37591
430	36670	37591
431	36653.8	37591
432	36653.8	37591
433	36653.8	37591
434	36653.8	37591
435	36653.8	37591
436	36653.8	37591
437	36653.8	37591
438	36653.8	37591
439	36653.8	37591
440	36653.8	37591
441	36653.8	37591
442	36653.8	37591
443	36653.8	37591
444	36653.8	37591
445	36653.8	37591
446	36648.3	37591
447	36648.3	37591
448	36648.3	37591
449	36648.3	37591
450	36648.3	37591
451	36642.1	37591
452	36642.1	37591
453	36642.1	37591
454	36642.1	37591
455	36642.1	37591
456	36642.1	37591
457	36632.1	37591
458	36632.1	37591
459	36632.1	37591
460	36632.1	37591
461	36632.1	37591
462	36632.1	37591
463	36632.1	37591
464	36627.8	37591
465	36627.8	37591
466	36627.8	37591
467	36627.8	37591
468	36627.8	37591
469	36627.8	37591
470	36627.4	37591
471	36627.4	37591
472	36627.4	37591
473	36627.4	37591
474	36623.9	37591
475	36623.9	37591
476	36623.9	37591
477	36618.3	37591
478	36618.3	37591
479	36618.3	37591
480	36618.3	37591
481	36618.3	37591
482	36618.3	37591
483	36611.1	37591
484	36603.1	37591
485	36603.1	37591
486	36603.1	37591
487	36590	37591
488	36590	37591
489	36590	37591
490	36590	37591
491	36590	37591
492	36590	37591
493	36590	37591
494	36590	37591
495	36590	37591
496	36590	37591
497	36590	37591
498	36590	37591
499	36590	37591
500	36590	37591
